# Supplementary material for: Risk Factors for Generalization in Patients with Ocular Myasthenia Gravis: A Multicenter Retrospective Cohort Study
Source: PubMed Central journal article supplement — Neurol Ther. 2021 Nov 2;11(1):73–86. doi: 10.1007/s40120-021-00292-x (PMC8857387; doi:10.1007/s40120-021-00292-x), 2021-11-02
Supplement: 40120_2021_292_MOESM1_ESM.pdf [file 40120_2021_292_MOESM1_ESM.pdf]

## **Risk factors for generalization in patients with ocular myasthenia gravis: a multicenter retrospective cohort study**

Rong-Jing Guo, Ting Gao, Zhe Ruan, Hong-Yu Zhou, Feng Gao, Quan Xu, Li-Ping Yu, Song-Di Wu, Tao Lei, Huan-Huan Li, Chao Sun, Min Zhang, Yan-Wu Gao, Xiao-Dan Lu, Yong-Lan Tang, Bao-li Tang, Fei-Yan Huo, Ying Zhu, Zhu-Yi Li, Ting Chang

Rong-Jing Guo, Ting Gao, Zhe Ruan, Hong-Yu Zhou and Feng Gao are co-first authors.

### **Author Affiliations:**

**Department of Neurology, Tangdu Hospital, the Fourth Military Medical University, Xi'an, China**

Rong-Jing Guo, Ting Gao, Zhe Ruan, Huan-Huan Li, Chao Sun, Min Zhang, Yan-Wu Gao, Xiao-Dan Lu, Yong-Lan Tang, Bao-Li Tang, Fei-Yan Huo, Ying Zhu, Zhu-Yi Li & Ting Chang

**Department of Neurology, West China Hospital, Sichuan University, Chengdu, China**

Hong-Yu Zhou

**Department of Neuroimmunology, Henan Institute of Medical and Pharmaceutical Sciences, Zhengzhou University, Zhengzhou, China**

Feng Gao

**Department of Thoracic surgery, Jiangxi Provincial People's Hospital, Nanchang, China**

Quan Xu

**Department of Neurology, Xianyang First People's Hospital, Xianyang, China**

Li-Ping Yu

**Department of Neurology, Xi'an No.1 Hospital, Xi'an, China**

Song-Di Wu

**Department of Neurology, Xi'an Fourth Hospital, Xi'an, China**

Tao Lei

### **Corresponding Author:**

Ting Chang, Department of Neurology, Tangdu Hospital, the Fourth Military Medical University, Xi'an 710038, China [changting1981@163.com](mailto:changting1981@163.com)

or Zhu-Yi Li, Department of Neurology, Tangdu Hospital, the Fourth Military Medical University, Xi'an 710038, China [lizhuyiafu@163.com](mailto:lizhuyiafu@163.com)

**Table S1. Ethics Committees of each medical center**

|                        |                                                                             |
|------------------------|-----------------------------------------------------------------------------|
| Master research center | Ethics Committee of Tangdu Hospital, the Fourth Military Medical University |
| Sub-centers            | Ethics Committee of West China Hospital of Sichuan University               |
|                        | Ethics Committee of Henan Institute of Medical and Pharmaceutical Sciences  |
|                        | Ethics Committee of Jiangxi Provincial People's Hospital                    |
|                        | Ethics Committee of Xianyang First People's Hospital                        |
|                        | Ethics Committee of Xi'an No.1 Hospital                                     |
|                        | Ethics Committee of Xi'an Fourth Hospital                                   |

**Table S2. Baseline characteristics of the study population in the imputed datasets**

|                                                            | <b>Overall<br/>(n=572)</b> | <b>OMG-M<br/>(n=428)</b> | <b>OMG-G<br/>(n=144)</b> | <b>P-value</b>      |
|------------------------------------------------------------|----------------------------|--------------------------|--------------------------|---------------------|
| <b>Sex, n (%)</b>                                          |                            |                          |                          | 0.27                |
| Male                                                       | 303 (53.0)                 | 233 (54.4)               | 70 (48.6)                |                     |
| Female                                                     | 269 (47.0)                 | 195 (45.6)               | 74 (51.4)                |                     |
| <b>Onset age, years,<br/>mean ± SD</b>                     | (45.5 ± 19.8)              | (42.8±20.6)              | (53.5±14.8)              | <0.001              |
| <b>Onset age, years, n (%)</b>                             |                            |                          |                          | <0.001 <sup>a</sup> |
| <18                                                        | 62 (10.8)                  | 59 (13.8)                | 3 (2.1)                  |                     |
| 18-49                                                      | 236 (41.3)                 | 183 (42.8)               | 53 (36.8)                |                     |
| ≥50                                                        | 274 (47.9)                 | 186 (43.5)               | 88 (61.1)                |                     |
| <b>Onset symptoms, n (%)</b>                               |                            |                          |                          | 0.03                |
| Ptosis                                                     | 358 (62.6)                 | 279 (65.2)               | 79 (54.9)                |                     |
| Diplopia/Diplopia and ptosis                               | 214 (37.4)                 | 149 (34.8)               | 65 (45.1)                |                     |
| <b>Comorbid autoimmune<br/>diseases, n (%)<sup>b</sup></b> |                            |                          |                          | 0.78 <sup>a</sup>   |
| No                                                         | 555 (97.0)                 | 416 (97.2)               | 139 (96.5)               |                     |
| Yes                                                        | 17 (3.0)                   | 12 (2.8)                 | 5 (3.5)                  |                     |
| <b>RNS findings, n (%)</b>                                 |                            |                          |                          | <0.001              |
| Normal                                                     | 266 (46.5)                 | 230 (53.7)               | 36 (25.0)                |                     |
| Abnormal                                                   | 306 (53.5)                 | 198 (46.3)               | 108 (75.0)               |                     |
| <b>AChR-Ab, n (%)</b>                                      |                            |                          |                          | <0.001 <sup>a</sup> |
| Seronegative                                               | 139 (24.3)                 | 130 (30.4)               | 9 (6.2)                  |                     |
| Seropositive                                               | 433 (75.7)                 | 298 (69.6)               | 135 (93.8)               |                     |
| <b>Neostigmine test, n (%)</b>                             |                            |                          |                          | 0.19 <sup>a</sup>   |
| Negative                                                   | 20 (3.5)                   | 18 (4.2)                 | 2 (1.4)                  |                     |
| Positive                                                   | 552 (96.5)                 | 410 (95.8)               | 142 (98.6)               |                     |
| <b>Thymic status, n (%)</b>                                |                            |                          |                          | 0.002               |
| Non-thymoma                                                | 479 (83.7)                 | 371 (86.7)               | 108 (75.0)               |                     |
| Thymoma                                                    | 93 (16.3)                  | 57 (13.3)                | 36 (25.0)                |                     |
| <b>Follow-up period,<br/>months, median (IQR)</b>          | 14.5<br>(7.0, 47.3)        | 24.0<br>(8.0, 57.0)      | 12.0<br>(6.0, 24.0)      | <0.001 <sup>c</sup> |

SD, standard deviation; IQR, interquartile range; RNS, repetitive nerve stimulation; AChR-Ab, acetylcholine receptor antibody; OMG, ocular myasthenia gravis; OMG-M, OMG maintenance; OMG-G, OMG generalized.

<sup>a</sup> Fisher's exact test.

<sup>b</sup> Comorbid autoimmune diseases included systemic lupus erythematosus, multiple sclerosis, rheumatoid arthritis, Hashimoto's thyroiditis, and optic neuromyelitis spectrum disease.

<sup>c</sup> Mann-Whitney U test.

**Fig S1. The relationship between Schoenfeld residual and time**

Global Schoenfeld Test p: 0.4804

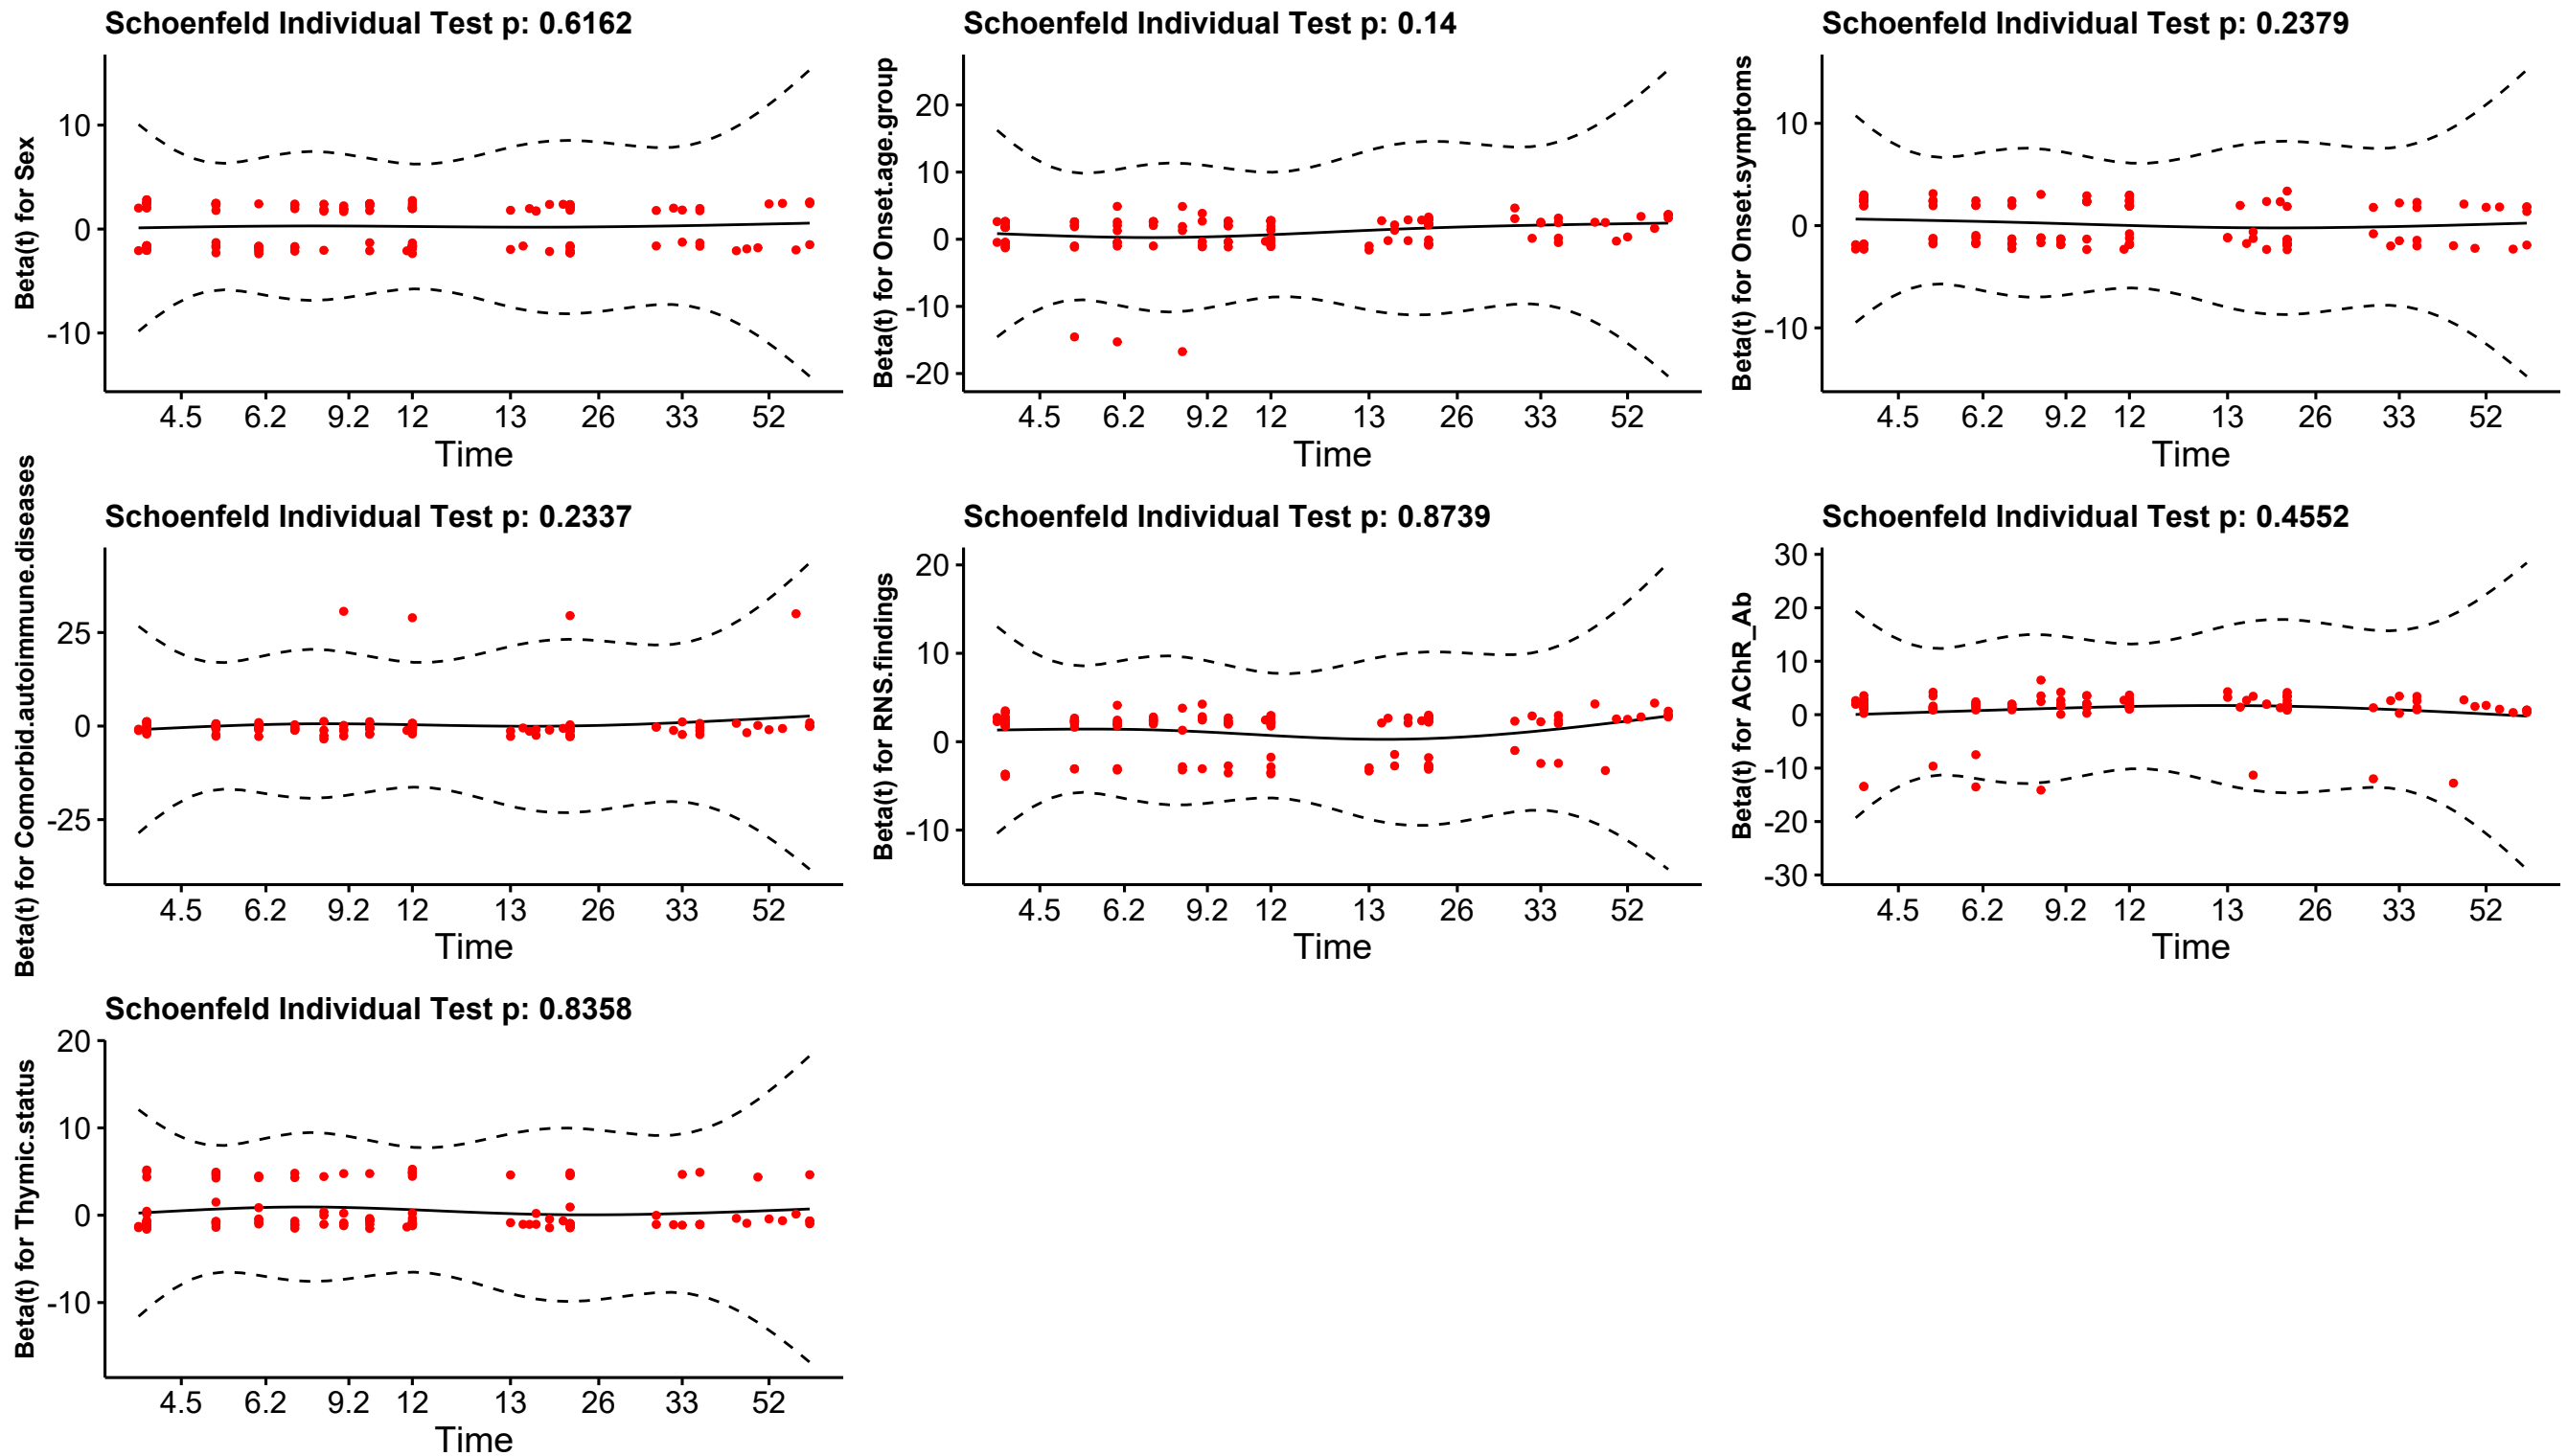

**Fig S2. Histogram of missing value patterns**

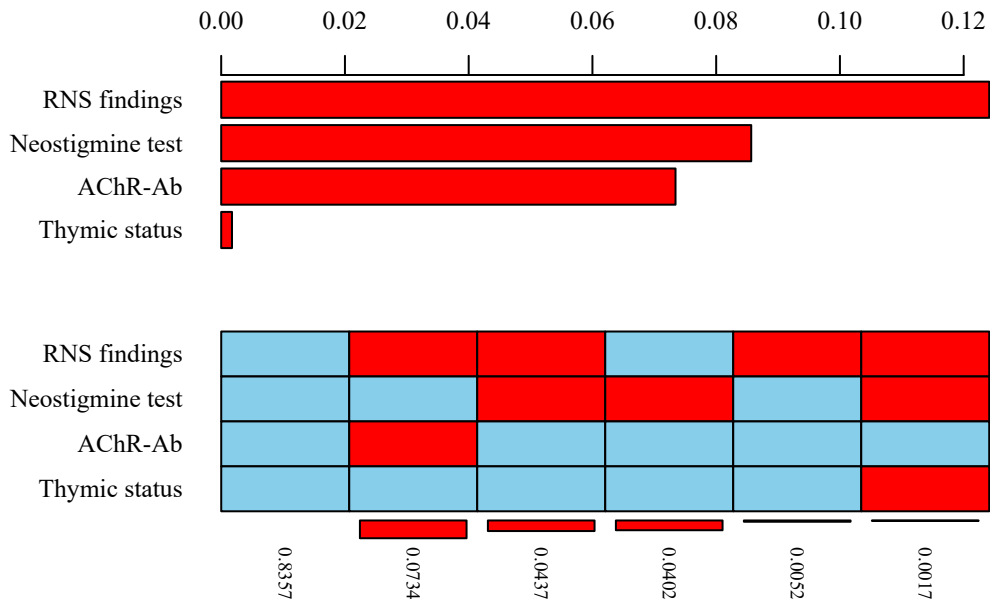

**Fig. S1 The relationship between Schoenfeld residual and time**

Each small graph represents the correlation of the standardized Schoenfeld residuals of the corresponding covariate with respect to time.

**Fig. S2 Histogram of missing value patterns**

The red grid represents missing data, the blue grid represents complete data, and the horizontal axis is the proportion of missing variables.
